# Supplementary material
Source: PubMed Central journal article supplement (PMC6299346)
Supplement: DS_10.1177_1941738118807122.pdf [file DS_10.1177_1941738118807122.pdf]

Appendix Table A1. Differences in basket toss injury rates, by time period

|                                                                             | Analysis 1: no lag         | Analysis 2: 1-year lag      | Analysis 3: 2-year lag       |
|-----------------------------------------------------------------------------|----------------------------|-----------------------------|------------------------------|
| High school and College Basket Toss Injuries                                |                            |                             |                              |
| Pre-rule change: Number of injuries/participation (12-24 years)             | 12/7762000                 | 14/9665800                  | 17/11270200                  |
| Injury rate (95% CI)*                                                       | 1.55 (0.67, 2.42)          | 1.45 (0.69, 2.21)           | 1.51 (0.79, 2.23)            |
| Post-rule change: Number of injuries/participation (12-24 years)            | 7/17666700                 | 5/15762900                  | 2/14158500                   |
| Injury rate (95% CI)*                                                       | 0.40 (0.10, 0.69)          | 0.32 (0.04, 0.60)           | 0.14 (-0.05, 0.34)           |
| <i>Rate difference (95% CI)*; p-value</i>                                   | -1.15 (-2.07, -0.23); 0.01 | -1.13 (-1.94, -0.32); 0.006 | -1.37 (-2.11, -0.62); <0.001 |
| High School Basket Toss Injuries                                            |                            |                             |                              |
| Pre-rule change: Number of injuries/participation (12-17 years)             | 8/5476100                  | 9/6950500                   | 12/8148800                   |
| Injury rate (95% CI)*                                                       | 1.46 (0.45, 2.47)          | 1.29 (0.45, 2.14)           | 1.47 (0.64, 2.31)            |
| Post-rule change: Number of injuries/participation (12-17 years)            | 6/13055900                 | 5/11581500                  | 2/10383200                   |
| Injury rate (95% CI)*                                                       | 0.46 (0.09, 0.83)          | 0.43 (0.05, 0.81)           | 0.19 (-0.07, 0.46)           |
| <i>Rate difference (95% CI)*; p-value</i>                                   | -1.00 (-2.08, 0.08); 0.07  | -0.86 (-1.79, 0.06); 0.07   | -1.28 (-2.16, -0.41); 0.01   |
| College Basket Toss Injuries                                                |                            |                             |                              |
| Pre-rule change: Number of injuries/participation (18-24 years)             | 4/2285900                  | 5/2715300                   | 5/3121400                    |
| Injury rate (95% CI)*                                                       | 1.75 (0.04, 3.46)          | 1.84 (0.23, 3.46)           | 1.60 (0.20, 3.01)            |
| Post-rule change: Number of injuries/participation (18-24 years)            | 1/4610800                  | 0/4181400                   | 0/3775300                    |
| Injury rate (95% CI)*                                                       | 0.22 (-0.21, 0.64)         | 0 (0, 0)                    | 0 (0, 0)                     |
| <i>Rate difference (95% CI)*; p-value</i>                                   | -1.87 (-3.93, 0.19); 0.09  | -1.84 (-3.46, -0.23); 0.03  | -1.60 (-3.01, -0.20); 0.03   |
| Analysis 1: Pre-rule change: 2002/3-2005/6; Post-rule change: 2006/7-2016/7 |                            |                             |                              |
| Analysis 2: Pre-rule change: 2002/3-2006/7; Post-rule change: 2007/8-2016/7 |                            |                             |                              |
| Analysis 3: Pre-rule change: 2002/3-2007/8; Post-rule change: 2008/9-2016/7 |                            |                             |                              |
| *Rate, rate difference and 95% CIs are per 1,000,000 participants.          |                            |                             |                              |
| Abbreviations: CI=confidence interval                                       |                            |                             |                              |
